# Supplementary material
Source: PubMed Central journal article supplement (PMC6019608)
Supplement: NIHMS952369-supplement.pdf [file NIHMS952369-supplement.pdf]

## Supplementary Figures

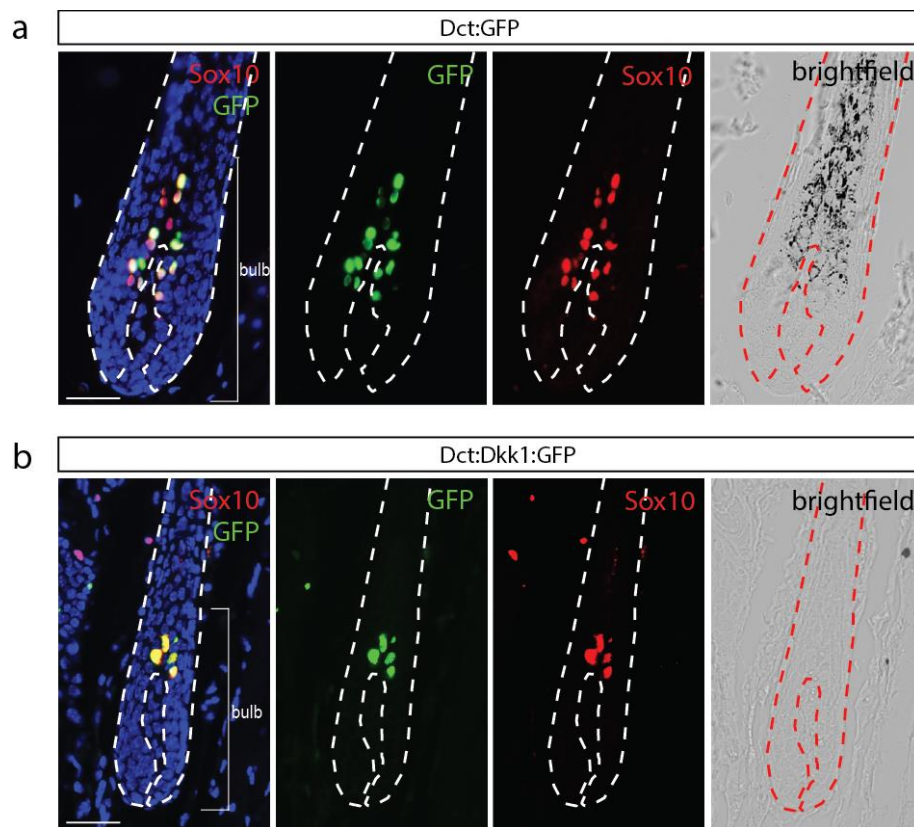

**Supplementary Figure 1. Dkk1 over-expression does not affect Sox10 expression in bulb melanocytes, related to Figure 1.**

(a-b) *Dct-rtTA; tetO-Dkk1; tetO-H2B-GFP* (Dct:Dkk1:GFP) and *Dct-rtTA; tetO-H2B-GFP* (Dct:GFP) control mice were treated with doxycycline starting from 3 weeks old. They were depilated at 7 weeks old to induce hair regeneration. Tissues were harvested at P12d (12 days after depilation) when hair follicles are at Anagen VI with pigment-producing differentiated melanocytes in the bulb. Immunofluorescence of Dct and Sox10 on paraffin tissue section and corresponding brightfield images of indicated genotypes at P12d. Dashed lines outline the boundary of epithelium and dermis. Scale bar: 25um.

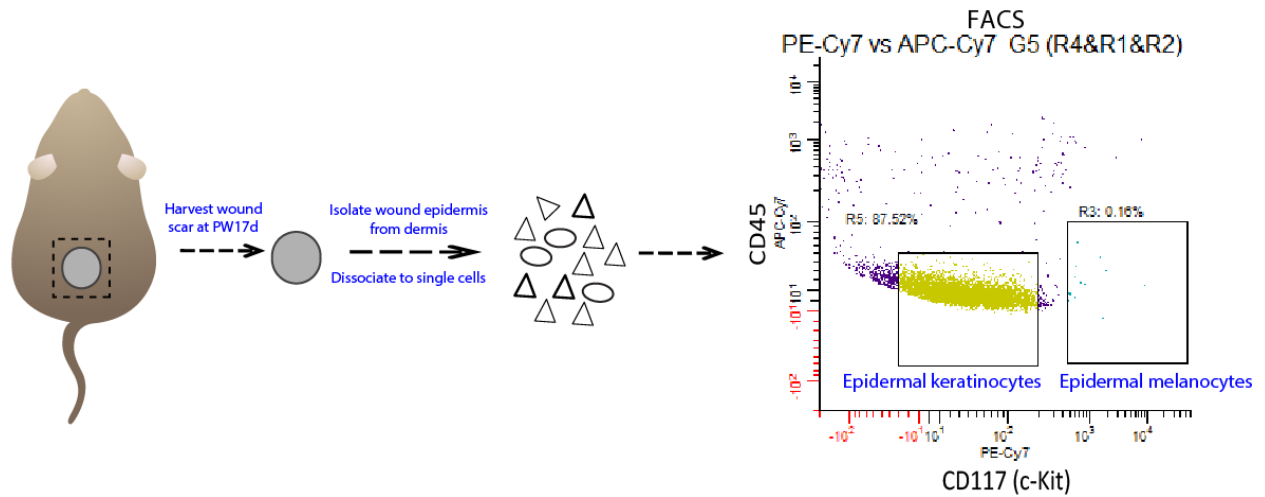

**Supplementary Figure 2. Isolation of epidermal melanocytes and keratinocytes from wound epidermis,** related to Figure 3.

Schematic illustration of the isolation of epidermal melanocytes and keratinocytes from wound epidermis. See details in Materials and Methods.

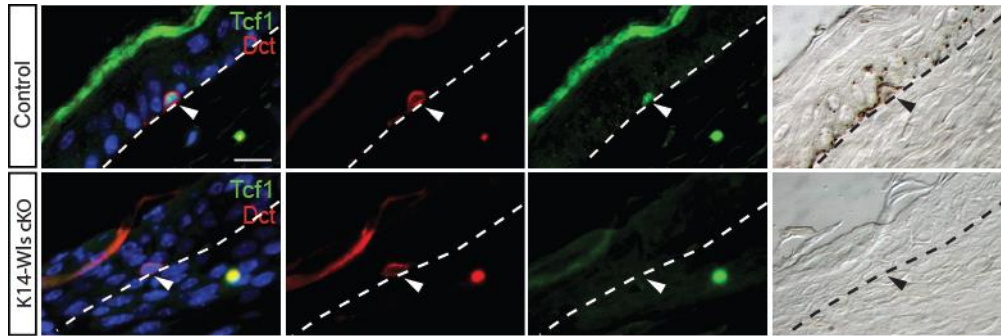

**Supplementary Figure 3. Epithelial Wnt ligands are required for Tcf1 expression in epidermal melanocytes,** related to Figure 3.

*K14-CreER; Wls fl/fl* (K14-Wls cKO) and control littermates were wounded and immediately treated with TAM for 7 days. Wound tissues were harvested at 21 days post wounding. Immunofluorescence of Dct and Tcf1 on paraffin tissue section and corresponding brightfield images of indicated genotypes. Dashed lines outline the boundary of epithelium and dermis. Arrowheads point to epidermal melanocytes. Scale bar: 25um.

**Supplementary Table 1. Primer List, Related to the Materials and Methods**

| Molecular probes for QPCR | Assay primer ID (Applied Biosystems) |
|---------------------------|--------------------------------------|
| Wnt 1                     | Mm01300555_gf                        |
| Wnt 2                     | Mm00470018_m1                        |
| Wnt 2b                    | Mm00437330_m1                        |
| Wnt 3                     | Mm00437336_m1                        |
| Wnt 3a                    | Mm03053669_s1                        |
| Wnt 4                     | Mm01194003_m1                        |
| Wnt 5a                    | Mm00437347_m1                        |
| Wnt 5b                    | Mm01183986_m1                        |
| Wnt 7a                    | Mm00437354_m1                        |
| Wnt 7b                    | Mm01301717_m1                        |
| Wnt 8a                    | Mm00436822_m1                        |
| Wnt 8b                    | Mm00442107_m1                        |
| Wnt 9a                    | Mm00460518_m1                        |
| Wnt 9b                    | Mm00457102_m1                        |
| Wnt 10a                   | Mm00437325_m1                        |
| Wnt 10b                   | Mm00442104_m1                        |
| Wnt 16                    | Mm00446420_m1                        |
